# Supplementary material for: Pancreatic cancer cells elevated MARCO expression on tumor-associated macrophages and promote the development of pancreatic ductal adenocarcinoma via inhibiting adaptive immune response
Source: Research Square preprint supplement (doi:10.21203/rs.3.rs-7288276/v1), 2025-08-27
Supplement: Supplementary file 1 [file 33569116740dbf6559e9a504.xlsx]

## Sheet: Sheet1
Supplementary Table 1. Summary of reagents and antibodies
Reagent	SOURCE	IDENTIFIER
PBS	Sparkjade	CR0014
DMEM	Gibco	C11995500BT
RPMI 1640	Gibco	CT11875500BT
FBS	Gibco	A5669701
Matrigel	Corning	354230
Red Blood Cell Lysis Buffer	Solarbio	R1010
Penicillin Streptomycin	Gibco	15140122
DAPI Solution	Solarbio	C0065
Tumor Dissociation Kit, mouse	Miltenyi Biotec	130-096-730
Ficoll	Solarbio	P8900
Human M-CSF	Miltenyi Biotec	130-096-491
Mouse M-CSF	Miltenyi Biotec	130-101-706
LPS(Mouse)	Sigma	L2630
LPS(Human)	Sigma	L4391
GMP IFN-gamma Protein, Human	MCE	HY-P78552
IFN-gamma Protein, Mouse	MCE	HY-P7071
Human IL-10 Recombinant Protein	PeproTech	200-10-10UG
Mouse IL-10 Recombinant Protein	PeproTech	210-10-10UG
Human IL-4 Recombinant Protein	PeproTech	200-04-20UG
Mouse IL-4 Recombinant Protein	PeproTech	214-14-20UG
Antibodies	SOURCE	IDENTIFIER
Anti-mouse Purified CD16/32	Biolegend	101302
Anti-mouse APC-Cy7 CD11b Antibody	Biolegend	101226
Anti-human APC CD11b Antibody	Biolegend	982604
Anti-mouse BV711 CD163 Antibody	Biolegend	155325
Anti-human APC CD163 Antibody	Biolegend	333610
Anti-mouse PE CD206 Antibody	Biolegend	141706
Anti-human Percp cy5.5 CD206 Antibody	Biolegend	321121
Anti-mouse FITC CD86 Antibody	Biolegend	105006
Anti-human PE Cy7 CD86 Antibody	Biolegend	374210
Anti-mouse AF 700 MARCO Antibody	R&D SYSTEMS	FAB29561N-100UG
Anti-human APC MARCO Antibody	Invitrogen	17-5447-42
Recombinant Anti CD68 Antibody	Akoya	4550113
Recombinant Anti-MARCO Antibody	Abcam	Ab314647
Recombinant Anti-CD56 Antibody	Abcam	Ab313780
Recombinant Anti-CD8 Antibody	Akoya	4250012
Recombinant Anti-CD4 Antibody	Akoya	4550112
Recombinant Anti-FoxP3 Antibody	Akoya	4550071
Recombinant Anti-Pan-CK Antibody	Akoya	4450093
Recombinant Anti-Ki67 Antibody	Akoya	4250019
